# Supplementary material for: Generation of Transgenic Cynomolgus Monkeys Overexpressing the Gene for Amyloid-β Precursor Protein
Source: PubMed Central journal article supplement — J Alzheimers Dis. 2020 May 5;75(1):45–60. doi: 10.3233/JAD-191081 (PMC7306892; doi:10.3233/jad-191081), 2020-05-05

# Supplementary Material

## Generation of Transgenic Cynomolgus Monkeys Overexpressing the Gene for Amyloid- $\beta$ Protein Precursor

Supplementary Table 1. Primary antibodies used in the experiments

| Antibody                                         | Resource                                       | Dilution |
|--------------------------------------------------|------------------------------------------------|----------|
| <b>Immunocytochemistry</b>                       |                                                |          |
| mouse anti-CDX2                                  | MU392A-UC; BioGenex, Fremont, CA               | 1:500    |
| rabbit anti-GFP (Alexa488 conjugated)            | A-21311; Thermo Fisher Scientific, Waltham, MA | 1:200    |
| mouse anti-FLAG                                  | M2; Sigma-Aldrich, St. Louis, MO               | 1:10,000 |
| <b>Immunohistochemistry</b>                      |                                                |          |
| rat anti-GFP                                     | GF090R; Nacalai Tesque, Kyoto, Japan           | 1:500    |
| rabbit anti-GFP                                  | #598; MBL, Nagoya, Japan                       | 1:500    |
| mouse anti-NeN                                   | A60; Merk Millipore, Burlington, MA            | 1:1,000  |
| mouse A $\beta$                                  | 4G8; Biolegend. San Diego, CA                  | 1:1,000  |
| mouse phosphorylated Tau                         | AT8; Thermo Fisher Scientific                  | 1:1,000  |
| <b>Western blotting</b>                          |                                                |          |
| rabbit anti-GFP                                  | A-21311; Thermo Fisher Scientific              | 1:4,000  |
| rabbit anti-APP C-terminal                       | A8714; Sigma-Aldrich                           | 1:1,000  |
| mouse anti-APP N-terminal                        | MAB348; Merk Millipore                         | 1:1,000  |
| mouse anti-APP N-terminal                        | 1D10; IBL, Gumma, Japan                        | 1:10,000 |
| mouse anti-FLAG                                  | M2; Sigma -Aldrich                             | 1:5,000  |
| rabbit anti-FLAG                                 | D6W5B; CST, Danvers, MA                        | 1:5,000  |
| mouse anti- $\beta$ -actin                       | C4; Santacruz Biotechnology, Dallas, TX        | 1:1,000  |
| rabbit anti- $\beta$ -actin (HRP-conjugated)     | PM053-7; MBL                                   | 1:4,000  |
| mouse P2A                                        | 3H4; Merk Millipore                            | 1:5,000  |
| <b>FACS</b>                                      |                                                |          |
| mouse anti-human CD20 (Alexa Fluo647 conjugated) | 302318; BioLegend                              | 1:10     |
| mouse anti-human CD3 (phycoerythrin-conjugated)  | 552127; BD Biosciences, Franklin Lakes, NJ     | 1:10     |
| mouse anti-CD11b (allophycocyanin-conjugated)    | 101212; BioLegend                              | 1:100    |

**Supplementary Figure 1. Raw data for western blot analysis in Figures 1E and 5C.**  
Uncropped western blot images shown in Figures 1E and 5C are presented.

**Fig.1E**

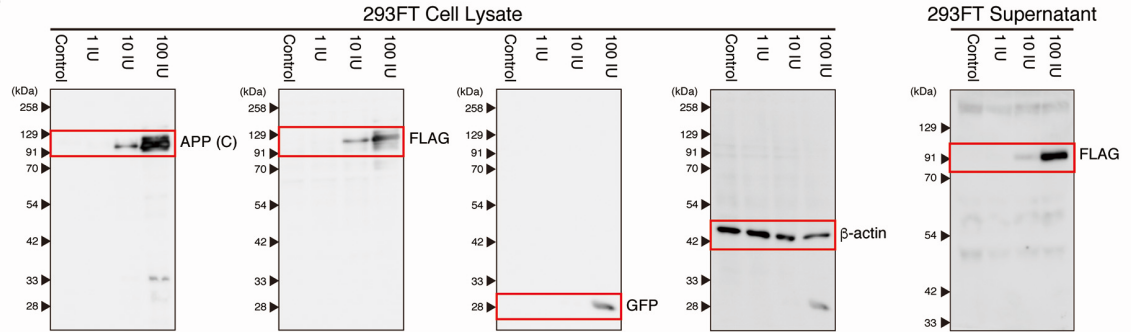

**Fig.4C**

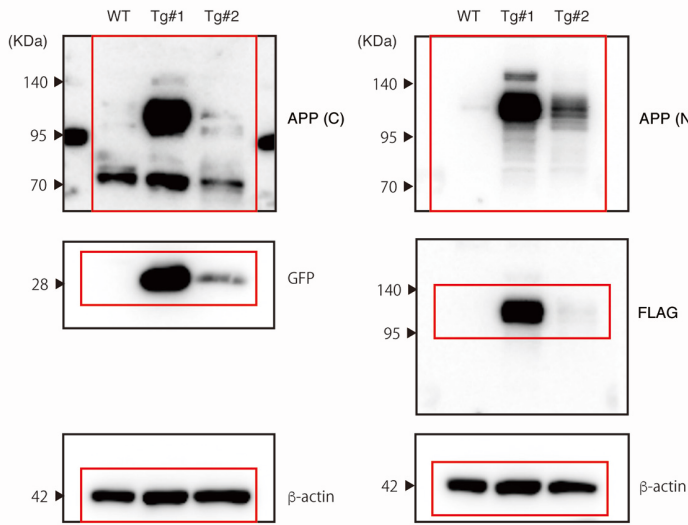

**Supplementary Figure 2. Immunohistochemistry of the skin (upper) and skeletal muscle (lower).** The sections were stained with an anti-GFP antibody with DAPI for nuclear staining, and observed using a confocal microscope (SP-8, Leica). Scale bar = 75  $\mu$ m.

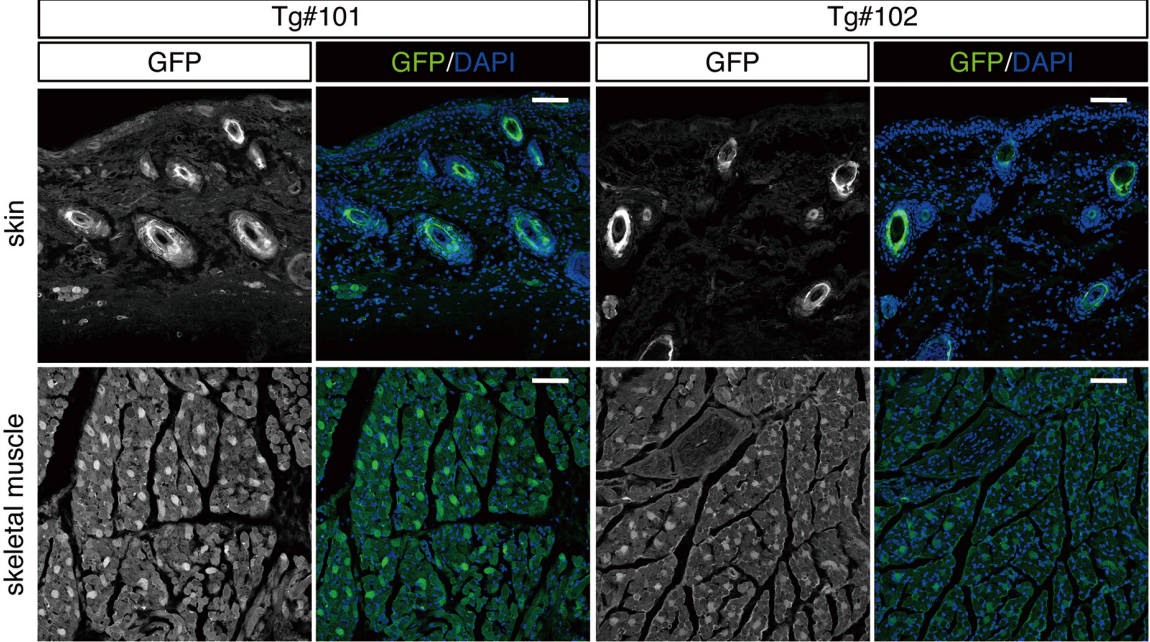

Supplement: jad-75-jad191081-s001.pdf [file jad-75-jad191081-s001.pdf]
